# Supplementary material for: Acute Effect of Electromyostimulation Superimposed on Running on Maximal Velocity, Metabolism, and Perceived Exertion
Source: MDPI journal article supplement (doi:10.3390/biology11040593), 2022-04-14
Supplement: s1 [file s1]

Table S1: Results of perceived exertion, oxygen uptake, lactate, and respiratory exchange ratio at the end of 8 km/h, 10 km/h, 12 km/h, and 14 km/h, as well as maximum velocity achieved, maximum running distance, maximum running time, maximum lactate, and lactate during the cool-down period, expressed as mean  $\pm$  SD.

| Parameters                                                      | n  | Control test    | 30 Hz             | 85 Hz               |
|-----------------------------------------------------------------|----|-----------------|-------------------|---------------------|
| Maximum achieved velocity [km/h]                                | 22 | 15.6 $\pm$ 1.1  | 15.1 $\pm$ 1.2 #  | 14.9 $\pm$ 1.1 #    |
| Maximum running distance [m]                                    | 22 | 2862 $\pm$ 485  | 2645 $\pm$ 491    | 2549 $\pm$ 449      |
| Maximum running time [s]                                        | 22 | 866 $\pm$ 101   | 818 $\pm$ 107     | 797 $\pm$ 99        |
| Perceived exertion 8 km/h [Borg scale]                          | 22 | 8.7 $\pm$ 1.9   | 8.8 $\pm$ 1.5     | 9.0 $\pm$ 1.8       |
| Perceived exertion 10 km/h [Borg scale]                         | 22 | 11.2 $\pm$ 2.2  | 11.9 $\pm$ 2.0 #  | 11.9 $\pm$ 2.0 #    |
| Perceived exertion 12 km/h [Borg scale]                         | 22 | 14.1 $\pm$ 1.8  | 15.1 $\pm$ 2.0 #  | 15.0 $\pm$ 2.0 #    |
| Perceived exertion 14 km/h [Borg scale]                         | 21 | 16.7 $\pm$ 2.1  | 17.9 $\pm$ 2.1 #  | 18.0 $\pm$ 1.9 #    |
| Perceived exertion maximum [Borg scale]                         | 22 | 19.6 $\pm$ 1.1  | 19.7 $\pm$ 1.1    | 19.5 $\pm$ 1.4      |
| Oxygen uptake 8 km/h [ml·min <sup>-1</sup> ·kg <sup>-1</sup> ]  | 17 | 31.7 $\pm$ 2.3  | 32.8 $\pm$ 3.4 #  | 32.8 $\pm$ 3.1 #    |
| Oxygen uptake 10 km/h [ml·min <sup>-1</sup> ·kg <sup>-1</sup> ] | 20 | 37.8 $\pm$ 2.7  | 38.5 $\pm$ 3.3 #  | 38.6 $\pm$ 3.7      |
| Oxygen uptake 12 km/h [ml·min <sup>-1</sup> ·kg <sup>-1</sup> ] | 20 | 43.2 $\pm$ 3.0  | 43.8 $\pm$ 3.5    | 44.2 $\pm$ 3.7      |
| Oxygen uptake 14 km/h [ml·min <sup>-1</sup> ·kg <sup>-1</sup> ] | 17 | 48.3 $\pm$ 3.6  | 48.7 $\pm$ 3.3    | 49.4 $\pm$ 3.4 #    |
| Oxygen uptake maximum [ml·min <sup>-1</sup> ·kg <sup>-1</sup> ] | 17 | 51.3 $\pm$ 5.3  | 51.2 $\pm$ 4.2    | 51.9 $\pm$ 5.2      |
| Lactate 8 km/h [mmol/l]                                         | 21 | 2.5 $\pm$ 0.9   | 2.5 $\pm$ 0.7     | 2.4 $\pm$ 0.8       |
| Lactate 10 km/h [mmol/l]                                        | 21 | 3.4 $\pm$ 1.3   | 3.5 $\pm$ 1.3     | 3.3 $\pm$ 1.2       |
| Lactate 12 km/h [mmol/l]                                        | 21 | 4.9 $\pm$ 1.8   | 5.2 $\pm$ 1.9     | 5.0 $\pm$ 1.9       |
| Lactate 14 km/h [mmol/l]                                        | 20 | 8.1 $\pm$ 3.3   | 8.4 $\pm$ 3.1     | 8.0 $\pm$ 3.4       |
| Lactate maximum [mmol/l]                                        | 21 | 12.9 $\pm$ 2.4  | 12.2 $\pm$ 2.5 #  | 10.6 $\pm$ 2.8 #, * |
| Lactate 1 min recovery [mmol/l]                                 | 21 | 12.6 $\pm$ 2.2  | 11.8 $\pm$ 2.4    | 10.3 $\pm$ 2.5 #, * |
| Lactate 3 min recovery [mmol/l]                                 | 21 | 12.6 $\pm$ 2.4  | 12.0 $\pm$ 2.5    | 10.3 $\pm$ 2.7 #, * |
| Lactate 5 min recovery [mmol/l]                                 | 21 | 12.3 $\pm$ 2.6  | 11.7 $\pm$ 2.7    | 10.1 $\pm$ 3.0 #, * |
| Lactate 10 min recovery [mmol/l]                                | 21 | 10.6 $\pm$ 3.2  | 10.3 $\pm$ 2.9    | 8.5 $\pm$ 3.2 #, *  |
| Respiratory exchange ratio 8 km/h                               | 17 | 0.88 $\pm$ 0.09 | 0.93 $\pm$ 0.06 # | 0.93 $\pm$ 0.06 #   |
| Respiratory exchange ratio 10 km/h                              | 20 | 0.95 $\pm$ 0.06 | 0.97 $\pm$ 0.06   | 0.97 $\pm$ 0.06     |
| Respiratory exchange ratio 12 km/h                              | 20 | 1.02 $\pm$ 0.06 | 1.04 $\pm$ 0.06   | 1.03 $\pm$ 0.07     |
| Respiratory exchange ratio 14 km/h                              | 17 | 1.09 $\pm$ 0.06 | 1.12 $\pm$ 0.05 # | 1.11 $\pm$ 0.06 #   |
| Respiratory exchange ratio maximum                              | 17 | 1.14 $\pm$ 0.05 | 1.16 $\pm$ 0.05   | 1.14 $\pm$ 0.05     |

Significances ( $p < 0.05$ ) compared to the control test are labeled with #, compared to 30 Hz with \*.
